# Supplementary material for: Highly efficient photocatalytic formic acid decomposition to syngas under visible light using CdS nanorods integrated with crystalline W2N3 nanosheets
Source: Royal Society of Chemistry journal article supplement (doi:10.1039/d2ta09482g), 2023-01-01
Supplement: d2ta09482g1.pdf [file d2ta09482g1.pdf]

*Supporting information*

**Highly Efficient Photocatalytic Formic Acid Decomposition to  
Syngas under Visible Light using CdS Nanorods Integrated with  
Crystalline W<sub>2</sub>N<sub>3</sub> Nanosheets**

*Taotao Wang,<sup>a,b</sup> Muqing Chen,<sup>\*a</sup> Jinbao Wu,<sup>b</sup> Pingwu Du<sup>\*b,c</sup>*

<sup>a</sup> School of Environment and Civil Engineering, Dongguan University of Technology, Dongguan, Guangdong Province, 523808, P. R. China.

<sup>b</sup> Hefei National Research Center for Physical Sciences at the Microscale, Anhui Laboratory of Advanced Photon Science and Technology, CAS Key Laboratory of Materials for Energy Conversion, Department of Materials Science and Engineering, University of Science and Technology of China, 96 Jinzhai Road, Hefei, Anhui Province, 230026, P. R. China.

<sup>c</sup> National Synchrotron Radiation Laboratory, University of Science and Technology of China, 443 Huangshan Road, Hefei, Anhui Province, 230029, P. R. China

<sup>\*</sup>Corresponding author: [mqchen@ustc.edu.cn](mailto:mqchen@ustc.edu.cn); [dupingwu@ustc.edu.cn](mailto:dupingwu@ustc.edu.cn)

Tel/Fax: 86-551-63606207

## **Experimental Methods**

### **Materials**

Ethylene diamine ( $\text{C}_2\text{H}_8\text{N}_2$ , 99.0%), thiourea ( $\text{CH}_4\text{N}_2\text{S}$ , 99.0%), cadmium chloride hemipentahydrate ( $\text{CdCl}_2 \cdot 2.5\text{H}_2\text{O}$ , 99.0%), sodium tungstate dihydrate, PVP (K-30), acetic acid ( $\text{C}_2\text{H}_4\text{O}_2$ , 99.0%), formic acid ( $\text{HCOOH}$ , 98%), and sodium hydroxide ( $\text{NaOH}$ , 96.0%) were purchased from Alfa-Aesar, Aldrich, or sinopharm chemical reagent Co.,Ltd and used without further purification. Millipore water (resistivity:  $\sim 18 \text{ M}\Omega \text{ cm}$ ) was used when needed.

### **Synthesis of CdS nanorods**

CdS nanorods were synthesized by referring to a previous report of our group. First, 4.62 g (10.125 mmol)  $\text{CdCl}_2 \cdot 2.5\text{H}_2\text{O}$  and 4.62 g (30.375 mmol) thiourea ( $\text{CH}_4\text{N}_2\text{S}$ ) were added into 60 mL ethylene diamine. The mixed solution was transferred into a 100 mL Teflon-lined autoclave. Then the autoclave was sealed and maintained at  $160^\circ\text{C}$  for 48 h. After cooling down to room temperature, centrifugation was used to collect the yellow precipitate, followed by washing with DI water and ethanol to remove organic residues. The final product was then dried at  $60^\circ\text{C}$  overnight.

### **Synthesis of $\text{W}_2\text{N}_3$ nanosheets**

$\text{W}_2\text{N}_3$  nanosheets were synthesized by a simple hydrothermal method and high-temperature calcination in an ammonia atmosphere. First, 330 mg (1 mmol) sodium tungstate dihydrate and 50 mg PVP were added into a mixture of 1 mL acetic acid and 6 mL deionized water. The obtained solution was stirred for 10 min and sonicated for 20 min, and then transferred to a Teflon-lined autoclave. The autoclave was sealed and heated at  $200^\circ\text{C}$  for 8 h. The obtained white precipitate was washed with DI water and ethanol several times by centrifugation and dried at  $60^\circ\text{C}$  overnight. Then the powder was placed in a quartz boat and transferred to a tubular furnace. The furnace was heated to  $700^\circ\text{C}$  with a rate of  $2^\circ\text{C}/\text{min}$  in an ammonia atmosphere for 3 h and cooled down naturally. The white powder turned black and  $\text{W}_2\text{N}_3$  nanosheets was successfully synthesized.

### **Synthesis of CdS/ $\text{W}_2\text{N}_3$ photocatalysts**

Two steps of grinding and calcining were used to synthesis the composite

CdS/W<sub>2</sub>N<sub>3</sub> photocatalysts. In the first step, 95 mg CdS and 5 mg W<sub>2</sub>N<sub>3</sub> were added into 30 mL ethanol with stirring for 30 min and sonicating for 10 min. After drying under N<sub>2</sub>, the mixture was ground for 20 min. In the second step, the obtained powder was calcined under argon at 300 °C for 1 h with a heating rate of 5 °C/min. Finally, the composite CdS/W<sub>2</sub>N<sub>3</sub> (5 wt%) photocatalysts were obtained and kept in a centrifuge tube for further tests. CdS/W<sub>2</sub>N<sub>3</sub> photocatalysts with different W<sub>2</sub>N<sub>3</sub> weight percentages (0.5, 1, 3, and 10 wt%) were also synthesized by the same method.

### **Characterization**

The scanning electron microscopy (SEM) images of all the samples were acquired using a Zeiss GeminiSEM 500. A FEI Talos F200X electron microscope was used to obtain transmission electron microscopy (TEM) images and energy-dispersive X-ray microscopy (EDX) mappings at an acceleration voltage of 200 kV. A D/max-TTR III was used to record X-ray diffraction (XRD) patterns at a scanning rate of 10° min<sup>-1</sup> from 10° to 80° (2θ). Optical absorption properties of all the samples were measured over a SOLID 3700 UV–vis spectrometer. X-ray photoelectron spectroscopy (XPS) measurements were carried out on an ESCALAB 250 X-ray photoelectron spectrometer. The steady-state photoluminescence (PL) spectra were measured on a Perkin-Elmer LS 55 fluorescence spectrometer with an excitation wavelength of 405 nm.

### **Photocatalytic FA Decomposition**

The photocatalytic activity tests of FA decomposition were carried out in a 50 mL round bottom flask at ambient temperature. The visible light irradiation was provided by a 300 W Xe lamp equipped with a UV cutoff filter ( $\lambda > 420$  nm). The typical photocatalytic solution was prepared by dispersing 2 mg photocatalysts in 20 mL mixture of FA and DI water. FA concentration and pH of the solution were adjusted by adding different amounts of FA and NaOH. Before the reaction, the obtained suspension was sonicated and then bubbled with high-purity nitrogen for 20 min to remove the air. The generated gases were determined by gas chromatography (GC-1690, Ar as a carrier gas) equipped with a thermal conductivity detector (TCD). The apparent quantum yield (AQY) was measured using monochromatic 420 nm light.

AQY was calculated using the following equation:

$$\begin{aligned} \text{AQY (\%)} &= \frac{\text{number of reacted electrons}}{\text{number of incident photons}} \times 100 \\ &= \frac{\text{number of evolved H}_2\text{molecules} \times 2}{\text{number of incident photons}} \times 100 \quad (1) \end{aligned}$$

### Photoelectrochemical measurements

All the photoelectrochemical measurements were performed using a conventional three-electrode cell with a Pt wire counter electrode, an Ag/AgCl reference electrode, and the photocatalyst-coated FTO as the working electrode. The electrolyte was 0.5 M Na<sub>2</sub>SO<sub>4</sub> solution. A CHI 660E electrochemical workstation (CH Instrument Inc., Shanghai) was used to record the electrochemical data. The illumination was provided by a 300 W Xe lamp equipped with a UV cutoff filter ( $\lambda > 420$  nm). The ethanol suspension of CdS/W<sub>2</sub>N<sub>3</sub> photocatalysts was prepared by adding 2 mg samples into 1 mL ethanol. After being sonicated, the suspension (100  $\mu$ L) was dropped onto the surface of FTO. The CdS/W<sub>2</sub>N<sub>3</sub> working electrode was obtained after drying at ambient temperature. The CdS working electrode for comparison was prepared by the same way.

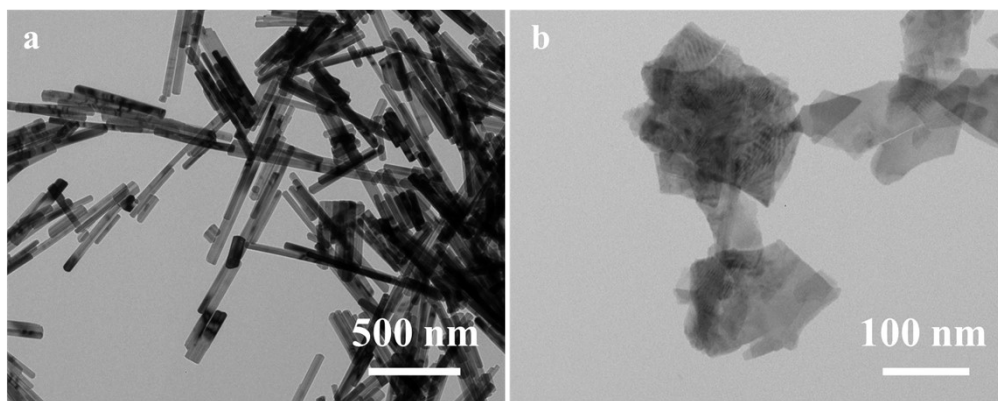

**Fig. S1.** TEM images of (a) CdS nanorods and (b) W<sub>2</sub>N<sub>3</sub> nanosheets.

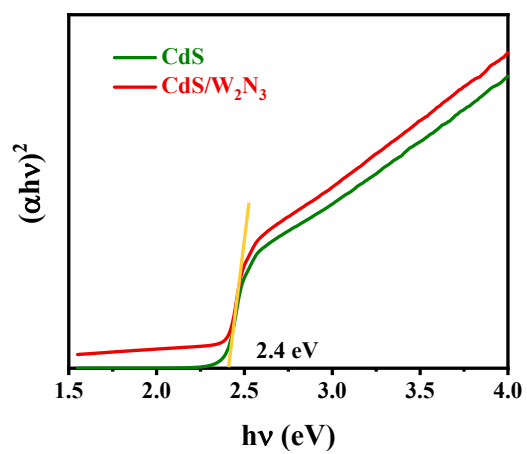

**Fig. S2.** Plots of  $(\alpha h\nu)^2$  vs photo energy.

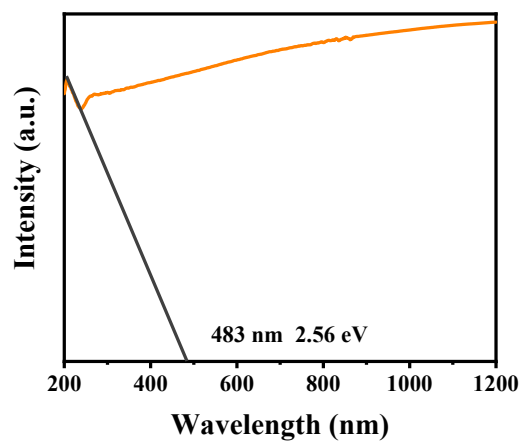

**Fig. S3.** Diffuse reflectance UV-vis spectra of  $W_2N_3$  nanosheets.

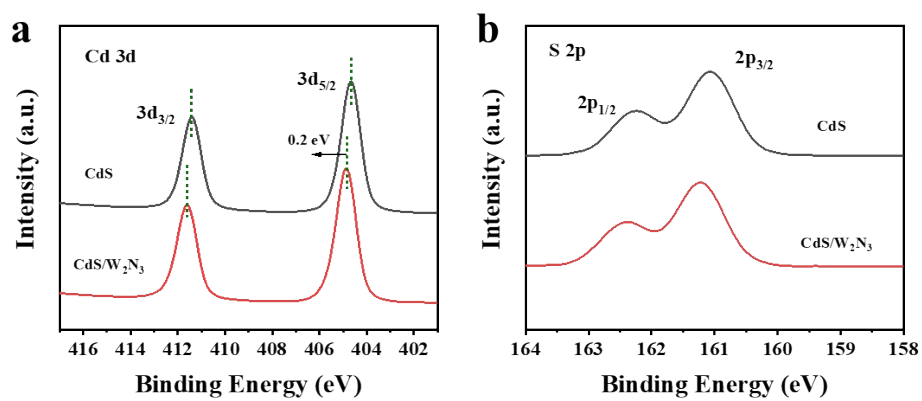

**Fig. S4.** Comparison of XPS spectra for CdS and 5 wt% CdS/W<sub>2</sub>N<sub>3</sub>. High-resolution XPS spectra of (a) Cd 3d and (b) S 2p.

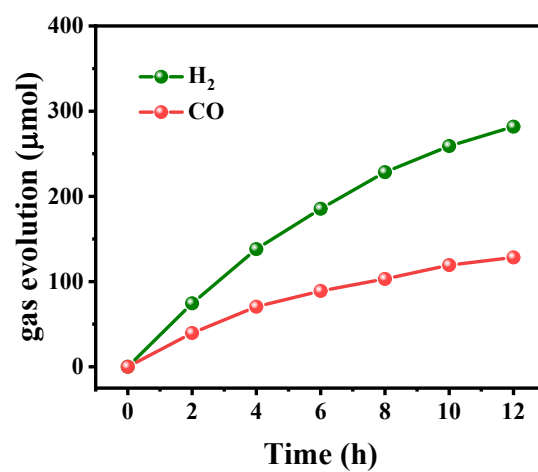

**Fig. S5.** Photocatalytic H<sub>2</sub> and CO evolution of CdS nanorods in 6 M FA aqueous solution using 2 mg photocatalyst at pH 3.5.

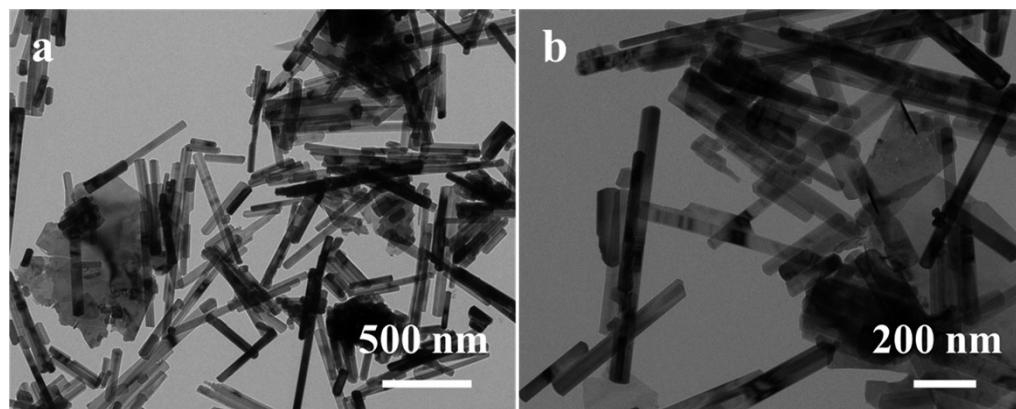

**Fig. S6.** TEM images after 54 h photocatalysis reaction in 6 M FA aqueous solution using 2 mg photocatalyst at pH 3.5.

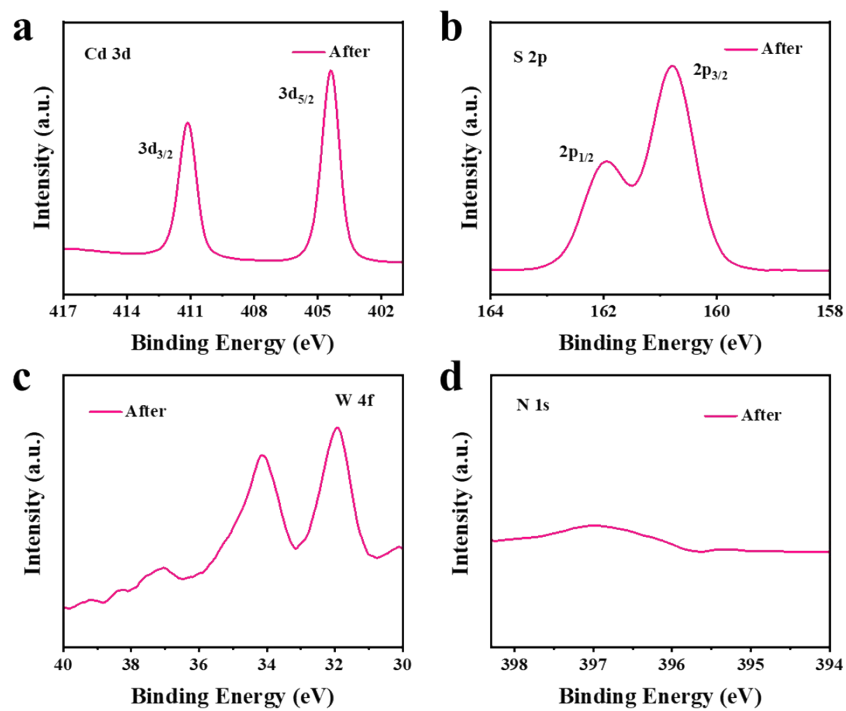

**Figure S7.** XPS data of 5 wt% CdS/W<sub>2</sub>N<sub>3</sub> samples after 54 h stability test in 6 M FA aqueous solution at pH 3.5. High-resolution XPS spectra of (a) Cd 3d, (b) S 2p, (c) W 4f, and (d) N 1s.

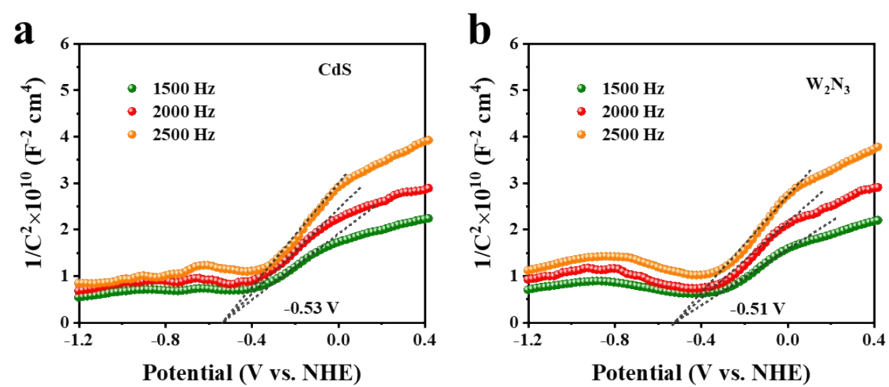

**Figure S8.** Mott–Schottky plots of (a) CdS nanorods and (b)  $\text{W}_2\text{N}_3$  nanosheets with different frequency in the dark.

**Table S1.** The photocatalytic performance with different amount of catalysts. Photocatalytic experiments were carried out in 20 mL formic acid solution (6.0 M) at pH 3.5 using 2 mg photocatalysts.

| Amount of<br>catalyst (mg) | H <sub>2</sub><br>( $\mu\text{mol h}^{-1}$ ) | H <sub>2</sub><br>( $\mu\text{mol mg}^{-1} \text{h}^{-1}$ ) | CO<br>( $\mu\text{mol h}^{-1}$ ) | CO<br>( $\mu\text{mol mg}^{-1} \text{h}^{-1}$ ) |
|----------------------------|----------------------------------------------|-------------------------------------------------------------|----------------------------------|-------------------------------------------------|
| 1                          | 124                                          | 124                                                         | 91                               | 91                                              |
| 2                          | 262                                          | 131                                                         | 207                              | 103.5                                           |
| 5                          | 508                                          | 101.6                                                       | 402                              | 80.4                                            |
| 10                         | 596                                          | 59.6                                                        | 501                              | 50.1                                            |

**Table S2.** Comparison of the H<sub>2</sub> and CO generation rate for photocatalytic formic acid decomposition of the CdS/W<sub>2</sub>N<sub>3</sub> with other reported high performance photocatalysts.

| catalysts                                               | $\lambda$<br>(nm) | H <sub>2</sub><br>( $\mu\text{mol mg}^{-1} \text{h}^{-1}$ ) | AQY<br>(%, H <sub>2</sub> ) | CO<br>( $\mu\text{mol mg}^{-1} \text{h}^{-1}$ ) | AQY<br>(%, CO) | Stability<br>(h) | Reference                                                         |
|---------------------------------------------------------|-------------------|-------------------------------------------------------------|-----------------------------|-------------------------------------------------|----------------|------------------|-------------------------------------------------------------------|
| FeP@CdS NRs                                             | $\geq 420$        | 278                                                         | 54                          | 0                                               | -              | > 96             | <i>ACS Appl. Mater. Interfaces</i> <b>2021</b> , 13, 23751-23759. |
| Fe salen/CdS NRs                                        | $\geq 420$        | 150                                                         | 16.8                        | 71.5                                            | 9.3            | > 30             | <i>Angew. Chem.</i> <b>2020</b> , 59, 14818-14824.                |
| CdS/CoP@RGO                                             | $\geq 420$        | 182                                                         | 32                          | trace                                           | -              | > 120            | <i>Joule</i> <b>2018</b> , 2, 549-557.                            |
| CoPSA-CdS NRs                                           | > 400             | 102                                                         | 6.47                        | 0                                               | -              | > 24             | <i>Adv. Mater.</i> <b>2020</b> , 32,1904249.                      |
| Co-Ni/CdS                                               | > 420             | 32.6                                                        | -                           | 0                                               | -              | > 18             | <i>ChemSusChem</i> <b>2018</b> , 11, 2587-2592.                   |
| Au <sub>0.75</sub> Pd <sub>0.25</sub> /TiO <sub>2</sub> | 1 sun             | 17.7                                                        | 15.6                        | 0.2                                             | -              | > 9              | <i>Appl. Catal. B Environ.</i> <b>2015</b> , 162, 204-209.        |
| Pd/C <sub>3</sub> N <sub>4</sub>                        | > 400             | 53.4                                                        | -                           | 0                                               | -              | > 6              | <i>Angew. Chem.</i> <b>2013</b> , 125, 12038-12041.               |
| Co <sup>2+</sup> /CdS QDs                               | > 420             | 116                                                         | 21.2                        | trace                                           | -              | > 168            | <i>Angew. Chem. Int. Ed.</i> <b>2015</b> , 54, 9627-9631.         |
| CdS/W <sub>2</sub> N <sub>3</sub>                       | $\geq 420$        | 131                                                         | 17.6                        | 103.5                                           | 16.9           | > 54             | This work                                                         |
